# Supplementary material for: CRISPR/Cas9 systems have off-target activity with insertions or deletions between target DNA and guide RNA sequences
Source: PubMed Central journal article supplement — Nucleic Acids Res. 2014 May 16;42(11):7473–85. doi: 10.1093/nar/gku402 (PMC4066799; doi:10.1093/nar/gku402), 2014-05-16
Supplement: supp_gku402_nar-03655-h-2013-File002.pdf [file supp_gku402_nar-03655-h-2013-File002.pdf]

# CRISPR/Cas9 systems have off-target activity despite insertions or deletions between target DNA and guide RNA sequences

Yanni Lin, Thomas J. Cradick, Matthew T. Brown, Harshavardhan Deshmukh, Piyush Ranjan,  
Neha Sarode, Brian M. Wile, Paula M. Vertino, Frank J. Stewart and Gang Bao

## Supplementary Information

### Contents

**Supplementary Figure S1.** Alignment of -1 nt sgRNA variants to the *HBB* and *CCR5* target loci showing mismatches instead of DNA bulge.

**Supplementary Figure S2.** Alignment of +1 nt sgRNA variants to the *HBB* and *CCR5* target loci showing mismatches instead of sgRNA bulge.

**Supplementary Figure S3.** T7E1 assay measuring the on-target endogenous gene modification efficiency of sgRNAs in HEK293T cells.

**Supplementary Figure S4.** Off-target cleavage of R30 Off-5 quantified by T7E1 assay and Sanger sequencing.

**Supplementary Figure S5.** Histone modification status and annotation of R30 Off-4 and Off-5 loci obtained from the UCSC genome browser.

**Supplementary Figure S6.** Quantitative PCR of sgRNA expression levels in HEK293T cells for R-01 and R-30 variants.

**Supplementary Figure S7.** Indel spectra for original sgRNAs and sgRNA variants determined using deep sequencing.

---

**Supplementary Table S1.** Protospacer target sites for the sgRNAs used in this study.

**Supplementary Table S2.** Guide sequences of sgRNA variants used in the model systems.

**Supplementary Table S3.** Sequences of primers used to amplify endogenous loci for testing the on-target activities of sgRNAs, and primers for qPCR.

**Supplementary Table S4.** Human genomic loci tested for off-target activity using T7E1 assay.

**Supplementary Table S5.** Primers used in PCRs for deep sequencing by an Illumina Miseq 2X250 paired-end read.

**Supplementary Table S6.** Human genomic loci tested for off-target activity using deep sequencing (Illumina Miseq 2X250 paired-end).

**Supplementary Figure S1**

**HBB gene**

|      |         |      |    |    |    |    |    |    |    |    |    |    |    |   |   |   |   |   |   |   |   |   |   |   |   |
|------|---------|------|----|----|----|----|----|----|----|----|----|----|----|---|---|---|---|---|---|---|---|---|---|---|---|
|      |         |      | 20 | 19 | 18 | 17 | 16 | 15 | 14 | 13 | 12 | 11 | 10 | 9 | 8 | 7 | 6 | 5 | 4 | 3 | 2 | 1 |   |   |   |
|      | HBB     |      | G  | T  | G  | A  | A  | C  | G  | T  | G  | G  | A  | T | G | A | A | G | T | T | G | G | T | G | G |
| R-01 | variant | -19  |    | G  | G  | A  | A  | C  | G  | T  | G  | G  | A  | T | G | A | A | G | T | T | G | G | N | G | G |
|      |         |      |    | *  |    |    |    |    |    |    |    |    |    |   |   |   |   |   |   |   |   |   |   |   |   |
|      | HBB     |      | G  | T  | G  | A  | A  | C  | G  | T  | G  | G  | A  | T | G | A | A | G | T | T | G | G | T | G | G |
| R-01 | variant | -18  |    | G  | T  | A  | A  | C  | G  | T  | G  | G  | A  | T | G | A | A | G | T | T | G | G | N | G | G |
|      |         |      |    | *  | *  |    |    |    |    |    |    |    |    |   |   |   |   |   |   |   |   |   |   |   |   |
|      | HBB     |      | G  | T  | G  | A  | A  | C  | G  | T  | G  | G  | A  | T | G | A | A | G | T | T | G | G | T | G | G |
| R-01 | variant | -7/6 |    |    |    |    |    |    |    |    |    |    |    |   |   |   |   |   |   |   |   |   |   |   |   |
|      |         |      |    |    |    |    |    |    |    |    |    |    |    |   |   |   | * | * | * |   |   | * |   |   |   |
|      | HBB     |      | G  | T  | G  | A  | A  | C  | G  | T  | G  | G  | A  | T | G | A | A | G | T | T | G | G | T | G | G |
| R-01 | variant | -2/1 |    |    |    |    |    |    |    |    |    |    |    |   |   |   |   |   |   |   |   |   |   |   |   |
|      |         |      |    |    |    |    |    |    |    |    |    |    |    |   |   |   |   |   |   |   |   |   |   | * |   |

**CCR5 gene**

|      |         |       |    |    |    |    |    |    |    |    |    |    |    |   |   |   |   |   |   |   |   |   |   |   |   |
|------|---------|-------|----|----|----|----|----|----|----|----|----|----|----|---|---|---|---|---|---|---|---|---|---|---|---|
|      |         |       | 20 | 19 | 18 | 17 | 16 | 15 | 14 | 13 | 12 | 11 | 10 | 9 | 8 | 7 | 6 | 5 | 4 | 3 | 2 | 1 |   |   |   |
|      | CCR5    |       | G  | T  | A  | G  | A  | G  | C  | G  | G  | A  | G  | G | C | A | G | G | A | G | G | C | G | G | G |
| R-30 | variant | -19   |    | G  | A  | G  | A  | G  | C  | G  | G  | A  | G  | G | C | A | G | G | A | G | G | C | N | G | G |
|      |         |       |    | *  |    |    |    |    |    |    |    |    |    |   |   |   |   |   |   |   |   |   |   |   |   |
|      | CCR5    |       | G  | T  | A  | G  | A  | G  | C  | G  | G  | A  | G  | G | C | A | G | G | A | G | G | C | G | G | G |
| R-30 | variant | -18   |    | G  | T  | G  | A  | G  | C  | G  | G  | A  | G  | G | C | A | G | G | A | G | G | C | N | G | G |
|      |         |       |    | *  | *  |    |    |    |    |    |    |    |    |   |   |   |   |   |   |   |   |   |   |   |   |
|      | CCR5    |       | G  | T  | A  | G  | A  | G  | C  | G  | G  | A  | G  | G | C | A | G | G | A | G | G | C | G | G | G |
| R-30 | variant | -17   |    | G  | T  | A  | A  | G  | C  | G  | G  | A  | G  | G | C | A | G | G | A | G | G | C | N | G | G |
|      |         |       |    | *  | *  | *  |    |    |    |    |    |    |    |   |   |   |   |   |   |   |   |   |   |   |   |
|      | CCR5    |       | G  | T  | A  | G  | A  | G  | C  | G  | G  | A  | G  | G | C | A | G | G | A | G | G | C | G | G | G |
| R-30 | variant | -16   |    | G  | T  | A  | G  | G  | C  | G  | G  | A  | G  | G | C | A | G | G | A | G | G | C | N | G | G |
|      |         |       |    | *  | *  | *  | *  |    |    |    |    |    |    |   |   |   |   |   |   |   |   |   |   |   |   |
|      | CCR5    |       | G  | T  | A  | G  | A  | G  | C  | G  | G  | A  | G  | G | C | A | G | G | A | G | G | C | G | G | G |
| R-30 | variant | -11   |    |    |    |    |    |    |    |    |    |    |    |   |   |   |   |   |   |   |   |   |   |   |   |
|      |         |       |    |    |    |    |    |    |    | *  | *  | *  | *  | * | * | * | * | * | * |   |   | * |   |   |   |
|      | CCR5    |       | G  | T  | A  | G  | A  | G  | C  | G  | G  | A  | G  | G | C | A | G | G | A | G | G | C | G | G | G |
| R-30 | variant | -10/9 |    |    |    |    |    |    |    |    |    |    |    |   |   |   |   |   |   |   |   |   |   |   |   |
|      |         |       |    |    |    |    |    |    |    |    |    |    |    |   |   |   |   |   |   |   |   |   |   |   |   |
|      | CCR5    |       | G  | T  | A  | G  | A  | G  | C  | G  | G  | A  | G  | G | C | A | G | G | A | G | G | C | G | G | G |
| R-30 | variant | -8    |    |    |    |    |    |    |    |    |    |    |    |   |   |   |   |   |   |   |   |   |   |   |   |
|      |         |       |    |    |    |    |    |    |    |    |    |    |    |   |   |   |   |   |   |   |   |   |   |   |   |
|      | CCR5    |       | G  | T  | A  | G  | A  | G  | C  | G  | G  | A  | G  | G | C | A | G | G | A | G | G | C | G | G | G |
| R-30 | variant | -7    |    |    |    |    |    |    |    |    |    |    |    |   |   |   |   |   |   |   |   |   |   |   |   |
|      |         |       |    |    |    |    |    |    |    |    |    |    |    |   |   |   |   |   |   |   |   |   |   |   |   |
|      | CCR5    |       | G  | T  | A  | G  | A  | G  | C  | G  | G  | A  | G  | G | C | A | G | G | A | G | G | C | G | G | G |
| R-30 | variant | -3/2  |    |    |    |    |    |    |    |    |    |    |    |   |   |   |   |   |   |   |   |   |   |   |   |
|      |         |       |    |    |    |    |    |    |    |    |    |    |    |   |   |   |   |   |   |   |   |   |   |   |   |
|      | CCR5    |       | G  | T  | A  | G  | A  | G  | C  | G  | G  | A  | G  | G | C | A | G | G | A | G | G | C | G | G | G |
| R-30 | variant | -1    |    |    |    |    |    |    |    |    |    |    |    |   |   |   |   |   |   |   |   |   |   |   |   |
|      |         |       |    |    |    |    |    |    |    |    |    |    |    |   |   |   |   |   |   |   |   |   |   |   |   |

**Supplementary Figure S1.** Alignment of -1 nt sgRNA variants to the *HBB* and *CCR5* target loci showing mismatches instead of DNA bulge. Only the variants with detectable intracellular activities are shown. The target loci and index names of the sgRNA variants are indicated on the left of each alignment. Mismatches in the guide sequence and in the “NGG” PAM are marked with asterisks below each alignment. The alignment with the minimum number of mismatches is shown for each sgRNA variant. Nucleotide “U” in the guide RNA is replaced with “T” for the ease of comparison to the target site.



|      |         |            |           |   |   |   |   |   |   |   |   |   |   |   |   |   |   |   |   |   |   |   |   |   |   |   |  |
|------|---------|------------|-----------|---|---|---|---|---|---|---|---|---|---|---|---|---|---|---|---|---|---|---|---|---|---|---|--|
| R-30 | variant | CCR5       | A         | G | T | A | G | A | G | C | G | G | A | G | G | C | A | G | G | A | G | G | C | G | G | G |  |
|      |         | A+15       | G         | T | A | G | A | G | A | C | G | G | A | G | G | C | A | G | G | A | G | G | C | N | G | G |  |
|      |         |            | * * * * * |   |   |   |   |   |   |   |   |   |   |   |   |   |   |   |   |   |   |   |   |   |   |   |  |
| R-30 | variant | CCR5       | A         | G | T | A | G | A | G | C | G | G | A | G | G | C | A | G | G | A | G | G | C | G | G | G |  |
|      |         | U+15       | G         | T | A | G | A | G | T | C | G | G | A | G | G | C | A | G | G | A | G | G | C | N | G | G |  |
|      |         |            | * * * * * |   |   |   |   |   |   |   |   |   |   |   |   |   |   |   |   |   |   |   |   |   |   |   |  |
| R-30 | variant | CCR5       | A         | G | T | A | G | A | G | C | G | G | A | G | G | C | A | G | G | A | G | G | C | G | G | G |  |
|      |         | C+15/14    | G         | T | A | G | A | G | C | C | G | G | A | G | G | C | A | G | G | A | G | G | C | N | G | G |  |
|      |         |            | * * * * * |   |   |   |   |   |   |   |   |   |   |   |   |   |   |   |   |   |   |   |   |   |   |   |  |
| R-30 | variant | CCR5       | A         | G | T | A | G | A | G | C | G | G | A | G | G | C | A | G | G | A | G | G | C | G | G | G |  |
|      |         | G+14/13/12 | G         | T | A | G | A | G | C | G | G | A | G | G | C | A | G | G | A | G | G | C | N | G | G |   |  |
|      |         |            | * * * * * |   |   |   |   |   |   |   |   |   |   |   |   |   |   |   |   |   |   |   |   |   |   |   |  |
| R-30 | variant | CCR5       | A         | G | T | A | G | A | G | C | G | G | A | G | G | C | A | G | G | A | G | G | C | G | G | G |  |
|      |         | U+13       | G         | T | A | G | A | G | C | G | T | G | A | G | G | C | A | G | G | A | G | G | C | N | G | G |  |
|      |         |            | * * * * * |   |   |   |   |   |   |   |   |   |   |   |   |   |   |   |   |   |   |   |   |   |   |   |  |
| R-30 | variant | CCR5       | A         | G | T | A | G | A | G | C | G | G | A | G | G | C | A | G | G | A | G | G | C | G | G | G |  |
|      |         | U+12       | G         | T | A | G | A | G | C | G | T | A | G | G | C | A | G | G | A | G | G | C | N | G | G |   |  |
|      |         |            | * * * * * |   |   |   |   |   |   |   |   |   |   |   |   |   |   |   |   |   |   |   |   |   |   |   |  |
| R-30 | variant | CCR5       | A         | G | T | A | G | A | G | C | G | G | A | G | G | C | A | G | G | A | G | G | C | G | G | G |  |
|      |         | A+12/11    | G         | T | A | G | A | G | C | G | A | A | G | G | C | A | G | G | A | G | G | C | N | G | G |   |  |
|      |         |            | * * * * * |   |   |   |   |   |   |   |   |   |   |   |   |   |   |   |   |   |   |   |   |   |   |   |  |
| R-30 | variant | CCR5       | G         | T | A | G | A | G | C | G | G | A | G | G | C | A | G | G | A | G | G | C | G | G | C |   |  |
|      |         | G+11/10/9  | G         | T | A | G | A | G | C | G | G | A | G | G | G | C | A | G | G | A | G | G | C | N | G | G |  |
|      |         |            | * * * * * |   |   |   |   |   |   |   |   |   |   |   |   |   |   |   |   |   |   |   |   |   |   |   |  |
| R-30 | variant | CCR5       | G         | T | A | G | A | G | C | G | G | A | G | G | C | A | G | G | A | G | G | C | G | G | C |   |  |
|      |         | C+9/8      | G         | T | A | G | A | G | C | G | G | A | G | G | C | C | A | G | G | A | G | G | C | N | G | G |  |
|      |         |            | * * * * * |   |   |   |   |   |   |   |   |   |   |   |   |   |   |   |   |   |   |   |   |   |   |   |  |
| R-30 | variant | CCR5       | G         | T | A | G | A | G | C | G | G | A | G | G | C | A | G | G | A | G | G | C | G | G | C |   |  |
|      |         | U+8        | G         | T | A | G | A | G | C | G | G | A | G | G | C | T | A | G | G | A | G | G | C | N | G | G |  |
|      |         |            | * * * * * |   |   |   |   |   |   |   |   |   |   |   |   |   |   |   |   |   |   |   |   |   |   |   |  |
| R-30 | variant | CCR5       | G         | T | A | G | A | G | C | G | G | A | G | G | C | A | G | G | A | G | G | C | G | G | C |   |  |
|      |         | G+8        | G         | T | A | G | A | G | C | G | G | A | G | G | C | G | A | G | G | A | G | G | C | N | G | G |  |
|      |         |            | * * * * * |   |   |   |   |   |   |   |   |   |   |   |   |   |   |   |   |   |   |   |   |   |   |   |  |
| R-30 | variant | CCR5       | G         | T | A | G | A | G | C | G | G | A | G | G | C | A | G | G | A | G | G | C | G | G | C |   |  |
|      |         | A+8/7      | G         | T | A | G | A | G | C | G | G | A | G | G | C | A | A | G | G | A | G | G | C | N | G | G |  |
|      |         |            | * * * * * |   |   |   |   |   |   |   |   |   |   |   |   |   |   |   |   |   |   |   |   |   |   |   |  |
| R-30 | variant | CCR5       | G         | T | A | G | A | G | C | G | G | A | G | G | C | A | G | G | A | G | G | C | G | G | C |   |  |
|      |         | G+7/6/5    | G         | T | A | G | A | G | C | G | G | A | G | G | C | A | G | G | G | A | G | G | C | N | G | G |  |
|      |         |            | * * * * * |   |   |   |   |   |   |   |   |   |   |   |   |   |   |   |   |   |   |   |   |   |   |   |  |

**Supplementary Figure S2.** Alignment of +1 nt sgRNA variants to the *HBB* and *CCR5* target loci showing mismatches instead of sgRNA bulge. Only the variants with detectable intracellular activities are shown. The target loci and index names of the sgRNA variants are indicated on the left of each alignment. Mismatches in the guide sequence and in the “NGG” PAM are marked with asterisks below each alignment. The alignment with the minimum number of mismatches is shown for each sgRNA variant. Nucleotide “U” in the guide RNA is replaced with “T” for the ease of comparison to the target site.

### Supplementary Figure S3

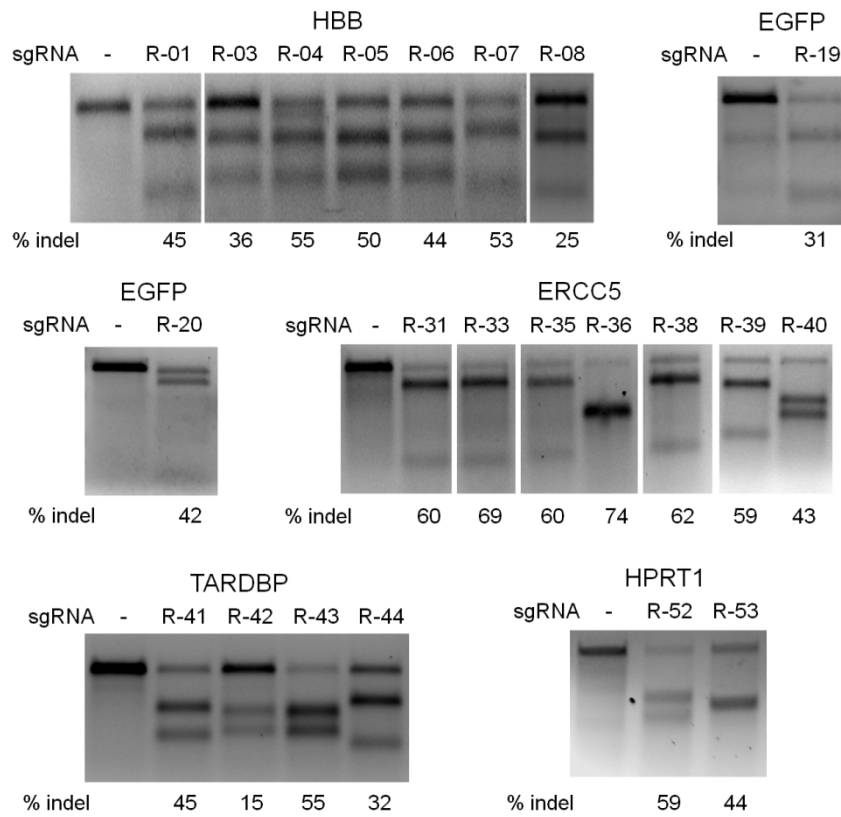

**Supplementary Figure S3.** T7E1 assay measuring the on-target endogenous gene modification efficiency of sgRNAs in HEK293T cells. Lane headings indicate the target genes and the sgRNA index names. “-” denotes samples transfected with a stuffer plasmid. Numbers below each lane having detectable activity show the percentage of modified alleles. Primers used for the PCR amplification are listed in **Supplementary Table S3**.

## Supplementary Figure S4

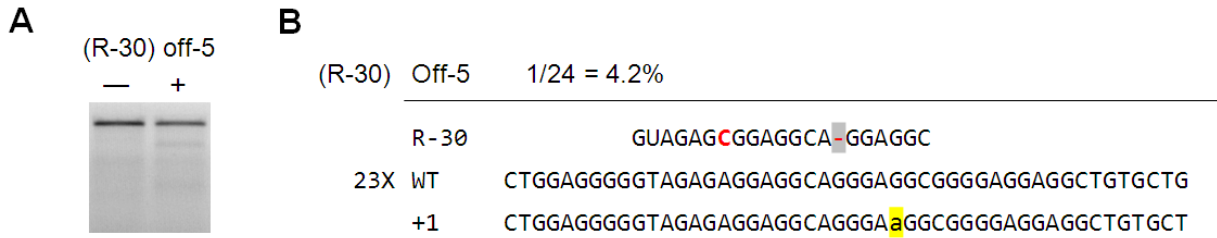

**Supplementary Figure S4.** Off-target cleavage of R30 Off-5 quantified by **(A)** T7E1 assay and **(B)** Sanger sequencing. “-” and “+” denote samples treated without and with nuclease, respectively. The occurrence of each sequence is indicated to the left of the alignment, if greater than one. Unmodified reads are indicated by “WT”. Deletions are marked in gray, and insertions marked in yellow.

## Supplementary Figure S5

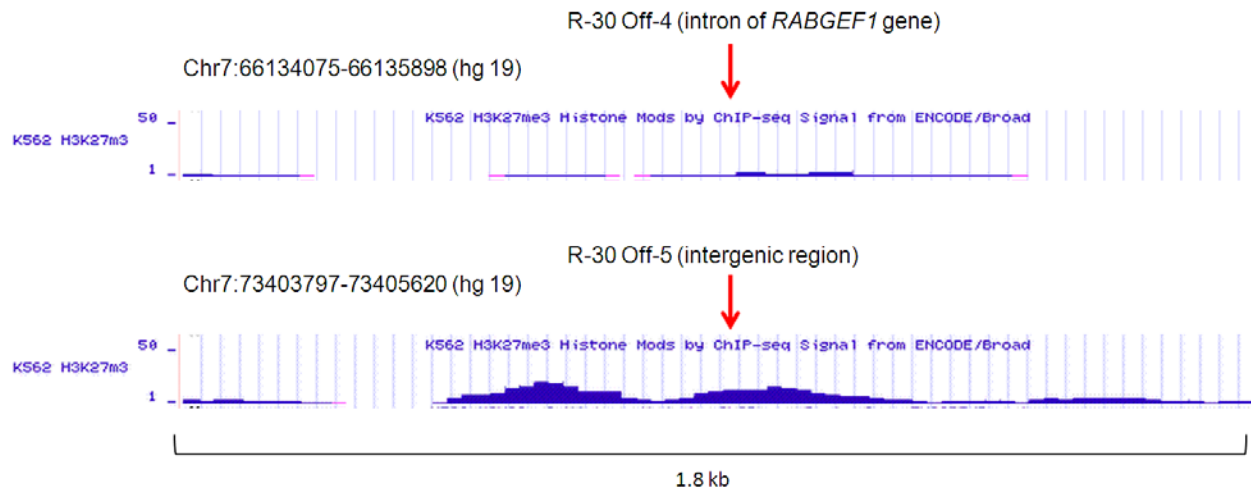

**Supplementary Figure S5.** Histone modification status and annotation of R30 Off-4 and Off-5 loci obtained from the UCSC genome browser.

### Supplementary Figure S6

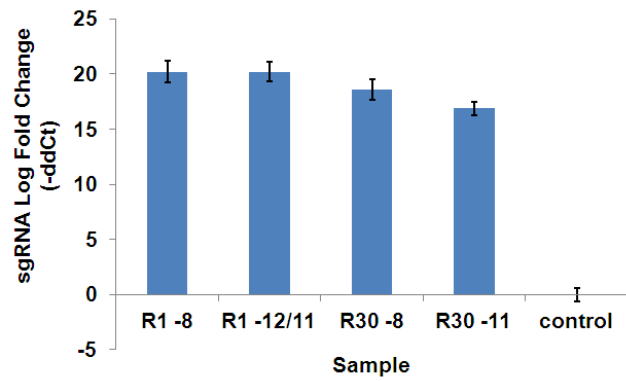

**Supplementary Figure S6.** Quantitative PCR of sgRNA expression levels in HEK293T cells for R-01 and R-30 variants. Relative expression of these sgRNAs was quantified using the ddCt method (see “**Material and Methods**”).

# Supplementary Figure S7

A

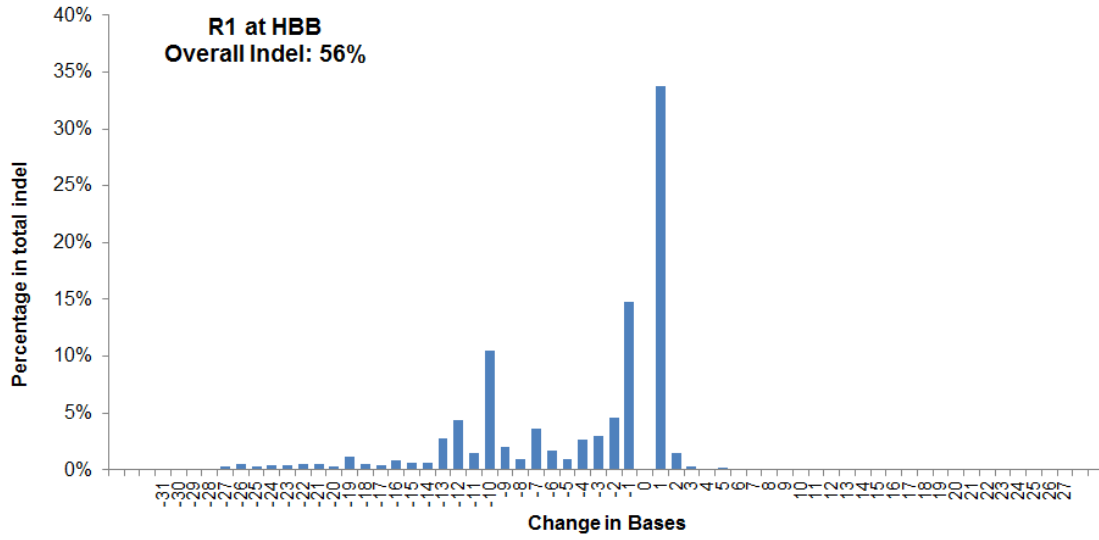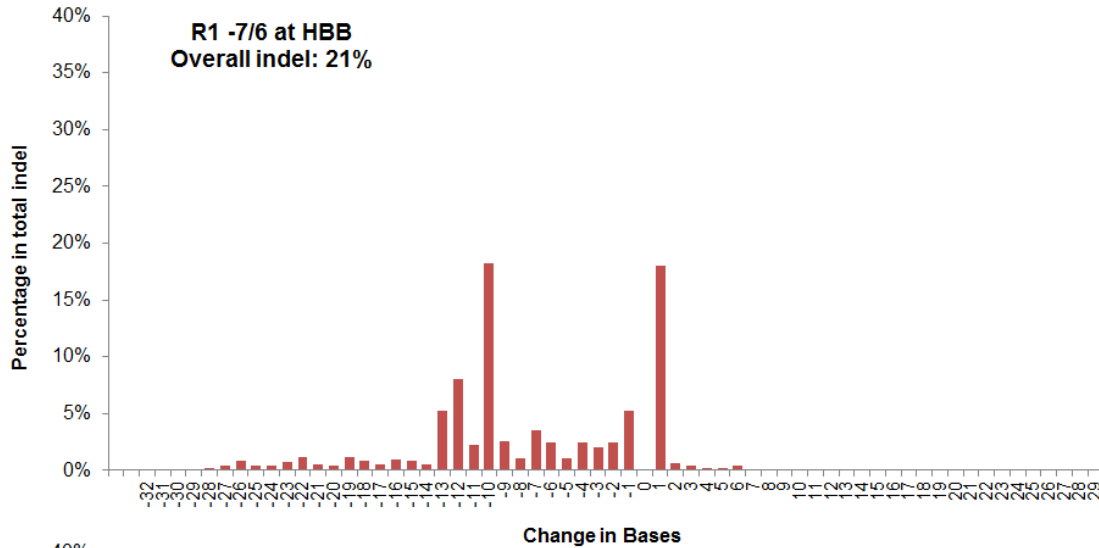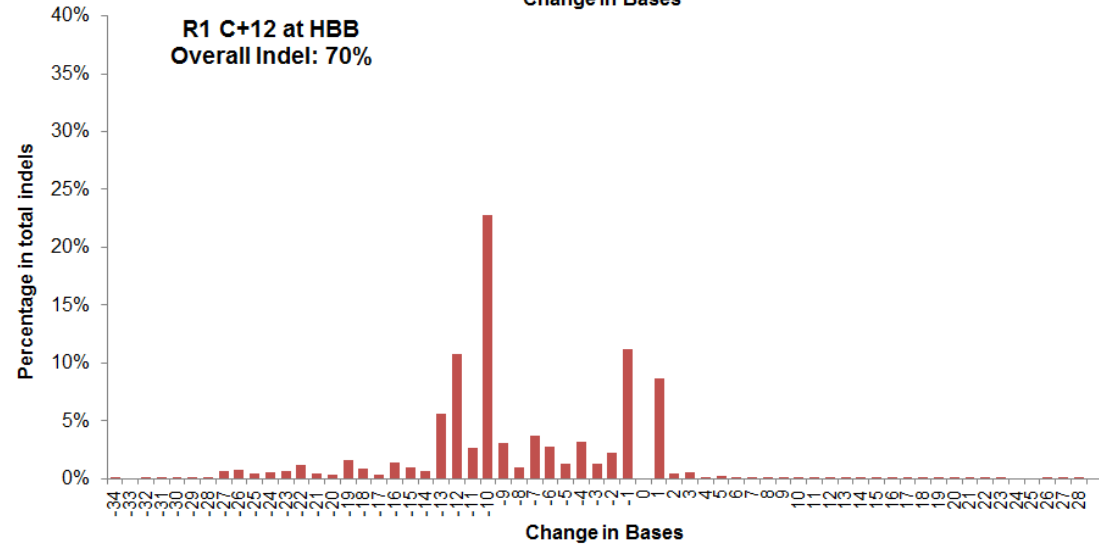



**B**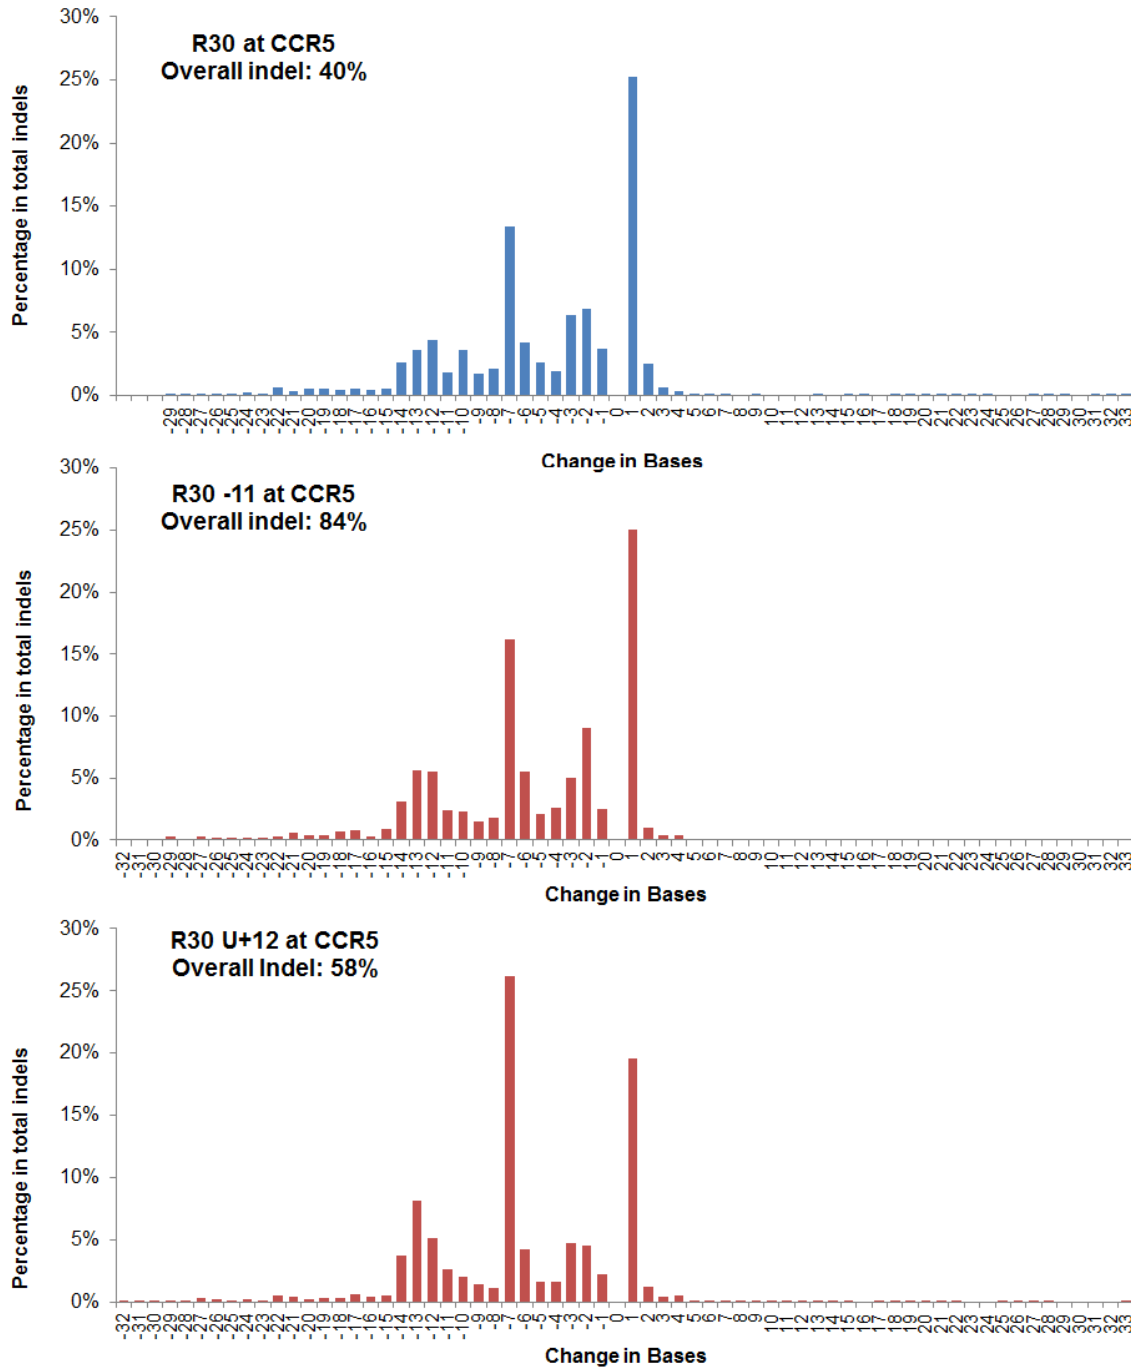

**Supplementary Figure S7.** Indel spectra for original sgRNAs and sgRNA variants determined using deep sequencing. (A) R-01 original sgRNA and variants for DNA bulge (R1 -7/6) and sgRNA bulge (R1 C+12). (B) R-30 original sgRNA and variants for DNA bulge (R30-11) and sgRNA bulge (R30 U+12). The change in bases at predicted cut sites resulting from indicated sgRNAs was calculated from  $\sim 10^4$  reads per sample. The y-axis represents percentages in all indel-reads for that sgRNA. Overall % indel in total reads are indicated in each graph.

**Supplementary Table S1.** Protospacer target sites for the sgRNAs studied. Target genes, target site sequences, and PAM sequences are listed.

| Gene   | Storage Index | Protospacer Target (5' to 3') | PAM |
|--------|---------------|-------------------------------|-----|
| HBB    | R-01          | GTGAACGTGGATGAAGTTGG          | TGG |
| HBB    | R-03          | GACGTTACCTTGCCCCACA           | GGG |
| HBB    | R-04          | GCACGTTACCTTGCCCCAC           | AGG |
| HBB    | R-05          | GGTCTGCCGTTACTGCCCTG          | TGG |
| HBB    | R-06          | GGTACTGCCCTGTGGGGCA           | AGG |
| HBB    | R-07          | GAGGTGAACGTGGATGAAGT          | TGG |
| HBB    | R-08          | GCTGTGGGGCAAGGTGAACG          | TGG |
| EGFP   | R-19          | GGTGGTGCAGATGAACTTCA          | GGG |
| EGFP   | R-20          | GACCAGGATGGGCACCACCC          | CGG |
| CCR5   | R-25          | GTGTTTCATCTTTGGTTTTGT         | GGG |
| CCR5   | R-26          | GCTGCCGCCAGTGGGACTT           | TGG |
| CCR5   | R-27          | GGCAGCATAGTGAGCCCAGA          | AGG |
| CCR5   | R-29          | GTGAGTAGAGCGGAGGCAGG          | AGG |
| CCR5   | R-30          | GTAGAGCGGAGGCAGGAGGC          | GGG |
| ERCC5  | R-31          | GCCAAGCACTTAAAGGAGTC          | CGG |
| ERCC5  | R-33          | GCAAGCACTTAAAGGAGTCC          | GGG |
| ERCC5  | R-35          | GTGAGTTCCCATGGCGATCC          | CGG |
| ERCC5  | R-36          | GCTATTGAAGAAACAGACTT          | TGG |
| ERCC5  | R-38          | GATTTTCTATTGAGTTCCCA          | TGG |
| ERCC5  | R-39          | GGAAACAAAGTGAGAAGATG          | AGG |
| ERCC5  | R-40          | GCCTATTTTTGTGTTTGATG          | GGG |
| TARDBP | R-41          | GCAGAGCAGTTGGGGTATGA          | TGG |
| TARDBP | R-42          | GGCAGCACTACAGAGCAGTT          | GGG |
| TARDBP | R-43          | GCAGCACTACAGAGCAGTTG          | GGG |
| TARDBP | R-44          | GCCTGACTGGTTCTGCTGGC          | TGG |
| HPRT1  | R-52          | GTTTGTGTCATTAGTGAAAC          | TGG |
| HPRT1  | R-53          | GCAACTTGAACCTCATCTT           | AGG |

**Supplementary Table S2.** Guide sequences of sgRNA variants used in the model systems and their cleavage activities tested in HEK 293T cells. Index names correspond to the index in Supplementary Figures S1-S2 and Figures 2-4. Red dashes indicate deleted nucleotides. Inserted nucleotides are colored in red. "nd", activity not detected in the T7E1 assay.

| Index                | Guide sequence       | % indel | s.e.m. |
|----------------------|----------------------|---------|--------|
| R-01 -1 nt           |                      |         |        |
| R-01 variant -19     | G-GAACGUGGAUGAAGUUGG | 40.1    | 5.4    |
| R-01 variant -18     | GU-AACGUGGAUGAAGUUGG | 24.3    | 5.5    |
| R-01 variant -17/16  | GUGA-CGUGGAUGAAGUUGG | nd      |        |
| R-01 variant -15     | GUGAA-GUGGAUGAAGUUGG | nd      |        |
| R-01 variant -14     | GUGAAC-UGGAUGAAGUUGG | nd      |        |
| R-01 variant -13     | GUGAACG-GGAUGAAGUUGG | nd      |        |
| R-01 variant -12/11  | GUGAACGUG-AUGAAGUUGG | nd      |        |
| R-01 variant -10     | GUGAACGUGG-UGAAGUUGG | nd      |        |
| R-01 variant -9      | GUGAACGUGGA-GAAGUUGG | nd      |        |
| R-01 variant -8      | GUGAACGUGGAU-AAGUUGG | nd      |        |
| R-01 variant -7/6    | GUGAACGUGGAUG-AGUUGG | 14.3    | 1.5    |
| R-01 variant -5      | GUGAACGUGGAUGAA-UUGG | nd      |        |
| R-01 variant -4/3    | GUGAACGUGGAUGAAG-UGG | nd      |        |
| R-01 variant -2/1    | GUGAACGUGGAUGAAGUU-G | 31.9    | 3.7    |
| R-01 5' truncation   |                      |         |        |
| R-01 d1 (variant 19) | GGAACGUGGAUGAAGUUGG  | 40.1    | 5.4    |
| R-01 d2              | GAACGUGGAUGAAGUUGG   | 39.3    | 17.3   |
| R-01 d3              | GACGUGGAUGAAGUUGG    | nd      |        |
| R-01 d4              | GCGUGGAUGAAGUUGG     | nd      |        |
| R-01 d5              | GGUGGAUGAAGUUGG      | nd      |        |
| R-01 d6              | GUGGAUGAAGUUGG       | nd      |        |
| R-30 -1 nt           |                      |         |        |
| R-30 variant -19     | G-AGAGCGGAGGCAGGAGGC | 44.0    | 4.5    |
| R-30 variant -18     | GU-GAGCGGAGGCAGGAGGC | 43.8    | 1.3    |
| R-30 variant -17     | GUA-AGCGGAGGCAGGAGGC | 5.7     | 2.2    |
| R-30 variant -16     | GUAG-GCGGAGGCAGGAGGC | 4.8     | 0.5    |
| R-30 variant -15     | GUAGA-CGGAGGCAGGAGGC | nd      |        |
| R-30 variant -14     | GUAGAG-GGAGGCAGGAGGC | nd      |        |
| R-30 variant -13/12  | GUAGAGCG-AGGCAGGAGGC | nd      |        |
| R-30 variant -11     | GUAGAGCGG-GGCAGGAGGC | 53.4    | 3.0    |
| R-30 variant -10/9   | GUAGAGCGGA-GCAGGAGGC | 28.4    | 3.9    |

|            |         |              |                       |      |      |
|------------|---------|--------------|-----------------------|------|------|
| R-30       | variant | -8           | GUAGAGCGGAGG-AGGAGGC  | 40.8 | 3.3  |
| R-30       | variant | -7           | GUAGAGCGGAGGC-GGAGGC  | 22.1 | 11.2 |
| R-30       | variant | -6/5         | GUAGAGCGGAGGCA-GAGGC  | nd   |      |
| R-30       | variant | -4           | GUAGAGCGGAGGCAGG-GGC  | nd   |      |
| R-30       | variant | -3/2         | GUAGAGCGGAGGCAGGA-GC  | 54.5 | 4.7  |
| R-30       | variant | -1           | GUAGAGCGGAGGCAGGAGG-  | 32.1 | 10.7 |
| R-08 -1 nt |         |              |                       |      |      |
| R-08       | variant | -19          | G-UGUGGGGCAAGGUGAACG  | 13.0 | 0.3  |
| R-08       | variant | -18          | GC-GUGGGGCAAGGUGAACG  | 23.5 | 1.4  |
| R-08       | variant | -17          | GCU-UGGGGCAAGGUGAACG  | 30.8 | 3.5  |
| R-08       | variant | -16          | GCUG-GGGGCAAGGUGAACG  | nd   |      |
| R-08       | variant | -15/14/13/12 | GCUGU-GGGCAAGGUGAACG  | 0.3  | 0.3  |
| R-08       | variant | -11          | GCUGUGGGG-AAGGUGAACG  | nd   |      |
| R-08       | variant | -10/9        | GCUGUGGGGCA-GGUGAACG  | nd   |      |
| R-08       | variant | -8/7         | GCUGUGGGGCAA-GUGAACG  | 1.1  | 0.9  |
| R-08       | variant | -6           | GCUGUGGGGCAAGG-GAACG  | nd   |      |
| R-08       | variant | -5           | GCUGUGGGGCAAGGU-AACG  | nd   |      |
| R-08       | variant | -4/3         | GCUGUGGGGCAAGGUG-ACG  | nd   |      |
| R-08       | variant | -2           | GCUGUGGGGCAAGGUGAA-G  | 2.2  | 0.5  |
| R-08       | variant | -1           | GCUGUGGGGCAAGGUGAAC-  | 1.5  | 0.5  |
| R-25 -1 nt |         |              |                       |      |      |
| R-25       | variant | -19          | G-GUUCAUCUUUGGUUUUGU  | nd   |      |
| R-25       | variant | -18          | GU-UUCAUCUUUGGUUUUGU  | nd   |      |
| R-25       | variant | -17/16       | GUG-UCAUCUUUGGUUUUGU  | nd   |      |
| R-25       | variant | -15          | GUGUU-AUCUUUGGUUUUGU  | nd   |      |
| R-25       | variant | -14          | GUGUUC-UCUUUGGUUUUGU  | nd   |      |
| R-25       | variant | -13          | GUGUUCA-CUUUGGUUUUGU  | nd   |      |
| R-25       | variant | -12          | GUGUUCAU-UUUGGUUUUGU  | nd   |      |
| R-25       | variant | -11/10/9     | GUGUUCAUC-UUGGUUUUGU  | nd   |      |
| R-25       | variant | -8/7         | GUGUUCAUCUUU-GUUUUGU  | nd   |      |
| R-25       | variant | -6/5/4/3     | GUGUUCAUCUUUGG-UUUGU  | nd   |      |
| R-25       | variant | -2           | GUGUUCAUCUUUGGUUUU-U  | nd   |      |
| R-25       | variant | -1           | GUGUUCAUCUUUGGUUUUG-  | nd   |      |
| R-01 +1 nt |         |              |                       |      |      |
| R-01       | variant | U+20/19      | GUUGAACGUGGAUGAAGUUGG | 28.2 | 21.4 |
| R-01       | variant | G+19/18      | GUGGAACGUGGAUGAAGUUGG | 30.9 | 4.1  |
| R-01       | variant | U+18         | GUGUAACGUGGAUGAAGUUGG | nd   |      |

|            |         |            |                                 |      |      |
|------------|---------|------------|---------------------------------|------|------|
| R-01       | variant | U+17       | GUGAU <u>U</u> ACGUGGAUGAAGUUGG | nd   |      |
| R-01       | variant | U+16       | GUGAA <u>U</u> CGUGGAUGAAGUUGG  | 39.9 | 4.1  |
| R-01       | variant | A+18/17/16 | GUGA <u>A</u> ACGUGGAUGAAGUUGG  | nd   |      |
| R-01       | variant | C+16/15    | GUGAA <u>C</u> CGUGGAUGAAGUUGG  | 44.7 | 6.7  |
| R-01       | variant | U+15       | GUGAAC <u>U</u> GUGGAUGAAGUUGG  | 53.5 | 1.5  |
| R-01       | variant | A+15       | GUGAAC <u>A</u> GUGGAUGAAGUUGG  | 37.5 | 4.9  |
| R-01       | variant | G+15/14    | GUGAAC <u>G</u> GUGGAUGAAGUUGG  | 17.1 | 11.2 |
| R-01       | variant | C+14       | GUGAAC <u>G</u> CUGGAUGAAGUUGG  | nd   |      |
| R-01       | variant | A+14       | GUGAAC <u>G</u> AUGGAUGAAGUUGG  | nd   |      |
| R-01       | variant | U+14/13    | GUGAAC <u>G</u> UUGGAUGAAGUUGG  | 39.7 | 3.0  |
| R-01       | variant | A+13       | GUGAAC <u>G</u> UAGGAUGAAGUUGG  | nd   |      |
| R-01       | variant | C+13       | GUGAAC <u>G</u> UCGGAUGAAGUUGG  | 9.0  | 0.2  |
| R-01       | variant | G+13/12/11 | GUGAAC <u>G</u> UGGGAUGAAGUUGG  | 41.3 | 0.7  |
| R-01       | variant | C+12       | GUGAAC <u>G</u> UGCGAUGAAGUUGG  | 56.5 | 3.8  |
| R-01       | variant | C+11       | GUGAAC <u>G</u> UGGCAUGAAGUUGG  | nd   |      |
| R-01       | variant | A+11/10    | GUGAAC <u>G</u> UGGAAUGAAGUUGG  | nd   |      |
| R-01       | variant | U+10/9     | GUGAAC <u>G</u> UGGAUUUGAAGUUGG | nd   |      |
| R-01       | variant | G+9/8      | GUGAAC <u>G</u> UGGAUGGAAGUUGG  | nd   |      |
| R-01       | variant | A+8/7/6    | GUGAAC <u>G</u> UGGAUGAAAGUUGG  | nd   |      |
| R-01       | variant | G+6/5      | GUGAAC <u>G</u> UGGAUGAAGGUUGG  | nd   |      |
| R-01       | variant | U+5/4/3    | GUGAAC <u>G</u> UGGAUGAAGUUUGG  | nd   |      |
| R-01       | variant | G+3/2/1    | GUGAAC <u>G</u> UGGAUGAAGUUGG   | nd   |      |
| R-30 +1 nt |         |            |                                 |      |      |
| R-30       | variant | U+20/19    | <u>G</u> UJAGAGCGGAGGCAGGAGGC   | 37.5 | 2.3  |
| R-30       | variant | A+19/18    | <u>G</u> UAAGAGCGGAGGCAGGAGGC   | 15.5 | 6.9  |
| R-30       | variant | G+18/17    | <u>G</u> UAGGAGCGGAGGCAGGAGGC   | 16.4 | 1.1  |
| R-30       | variant | C+17       | <u>G</u> UAGCAGCGGAGGCAGGAGGC   | 2.9  | 1.4  |
| R-30       | variant | U+17       | <u>G</u> UAGUAGCGGAGGCAGGAGGC   | nd   |      |
| R-30       | variant | A+17/16    | <u>G</u> UAGAAGCGGAGGCAGGAGGC   | 23.8 | 3.2  |
| R-30       | variant | U+16       | <u>G</u> UAGAUJCGGAGGCAGGAGGC   | 44.2 | 6.9  |
| R-30       | variant | C+16       | <u>G</u> UAGACGCGGAGGCAGGAGGC   | 24.5 | 5.1  |
| R-30       | variant | G+16/15    | <u>G</u> UAGAGGCGGAGGCAGGAGGC   | 23.4 | 0.5  |
| R-30       | variant | A+15       | <u>G</u> UAGAGACGGAGGCAGGAGGC   | 35.8 | 3.3  |
| R-30       | variant | U+15       | <u>G</u> UAGAGUCGGAGGCAGGAGGC   | 37.8 | 14.7 |
| R-30       | variant | C+15/14    | <u>G</u> UAGAGCCGGAGGCAGGAGGC   | 23.8 | 7.4  |
| R-30       | variant | A+14       | <u>G</u> UAGAGCAGGAGGCAGGAGGC   | nd   |      |
| R-30       | variant | U+14       | <u>G</u> UAGAGCUGGAGGCAGGAGGC   | nd   |      |

|            |         |            |                                                                                                                        |      |     |
|------------|---------|------------|------------------------------------------------------------------------------------------------------------------------|------|-----|
| R-30       | variant | G+14/13/12 | GUAGAGC <b>GGG</b> AGGCAGGAGGC                                                                                         | 17.8 | 1.1 |
| R-30       | variant | U+13       | GUAGAGCG <b>U</b> GAGGCAGGAGGC                                                                                         | 27.2 | 8.5 |
| R-30       | variant | U+12       | GUAGAGCGG <b>U</b> AGGCAGGAGGC                                                                                         | 45.4 | 1.6 |
| R-30       | variant | A+12/11    | GUAGAGCGG <b>A</b> AGGCAGGAGGC                                                                                         | 9.4  | 2.9 |
| R-30       | variant | G+11/10/9  | GUAGAGCGG <b>A</b> GGCAGGAGGC                                                                                          | 3.4  | 0.6 |
| R-30       | variant | C+9/8      | GUAGAGCGGAGG <b>C</b> CAGGAGGC                                                                                         | 10.6 | 0.6 |
| R-30       | variant | U+8        | GUAGAGCGGAGG <b>C</b> UAGGAGGC                                                                                         | 11.7 | 5.7 |
| R-30       | variant | G+8        | GUAGAGCGGAGG <b>C</b> GAGGAGGC                                                                                         | 13.9 | 7.6 |
| R-30       | variant | A+8/7      | GUAGAGCGGAGG <b>C</b> AAGGAGGC                                                                                         | 7.4  | 2.1 |
| R-30       | variant | G+7/6/5    | GUAGAGCGGAGG <b>C</b> AGGGAGGC                                                                                         | 1.7  | 0.5 |
| R-30       | variant | A+5/4      | GUAGAGCGGAGG <b>C</b> AGG <b>A</b> AGGC                                                                                | nd   |     |
| R-30       | variant | G+4/3/2    | GUAGAGCGGAGG <b>C</b> AGG <b>A</b> GGC                                                                                 | nd   |     |
| R-30       | variant | C+2/1      | GUAGAGCGGAGG <b>C</b> AGGAGG <b>C</b> C                                                                                | nd   |     |
| R-08 +1 nt |         |            |                                                                                                                        |      |     |
| R-08       | variant | U+20       | <b>G</b> U <b>C</b> UGUGGGG <b>C</b> AAGGUGAACG                                                                        | 17.0 | 0.7 |
| R-08       | variant | U+19/18    | <b>G</b> C <b>U</b> UGUGGGG <b>C</b> AAGGUGAACG                                                                        | 13.4 | 2.3 |
| R-08       | variant | C+18       | <b>G</b> C <b>U</b> <b>C</b> GUGGGG <b>C</b> AAGGUGAACG                                                                | 27.4 | 0.5 |
| R-08       | variant | U+17/16    | <b>G</b> CUG <b>U</b> UGGGG <b>C</b> AAGGUGAACG                                                                        | 15.5 | 2.7 |
| R-08       | variant | C+16       | <b>G</b> CUG <b>U</b> <b>C</b> GGGG <b>C</b> AAGGUGAACG                                                                | 3.2  | 0.2 |
| R-08       | variant | U+15       | <b>G</b> CUGUG <b>U</b> GGG <b>C</b> AAGGUGAACG                                                                        | 26.3 | 0.3 |
| R-08       | variant | U+14       | <b>G</b> CUGUGG <b>U</b> GG <b>C</b> AAGGUGAACG                                                                        | nd   |     |
| R-08       | variant | U+13       | <b>G</b> CUGUGGG <b>U</b> G <b>C</b> AAGGUGAACG                                                                        | 11.0 | 1.4 |
| R-08       | variant | U+12       | <b>G</b> CUGUGGGG <b>U</b> <b>C</b> AAGGUGAACG                                                                         | 25.2 | 0.8 |
| R-08       | variant | U+11       | <b>G</b> CUGUGGGG <b>C</b> <b>U</b> AAGGUGAACG                                                                         | 16.5 | 2.6 |
| R-08       | variant | U+10       | <b>G</b> CUGUGGGG <b>C</b> <b>U</b> AGGUGAACG                                                                          | nd   |     |
| R-08       | variant | U+9        | <b>G</b> CUGUGGGG <b>C</b> <b>A</b> <b>U</b> GGUGAACG                                                                  | nd   |     |
| R-08       | variant | U+8        | <b>G</b> CUGUGGGG <b>C</b> <b>A</b> <b>A</b> <b>U</b> GUGAACG                                                          | nd   |     |
| R-08       | variant | U+7/6      | <b>G</b> CUGUGGGG <b>C</b> <b>A</b> <b>A</b> <b>G</b> <b>U</b> UGAACG                                                  | nd   |     |
| R-08       | variant | C+6        | <b>G</b> CUGUGGGG <b>C</b> <b>A</b> <b>A</b> <b>G</b> <b>U</b> <b>C</b> GAACG                                          | nd   |     |
| R-08       | variant | U+5        | <b>G</b> CUGUGGGG <b>C</b> <b>A</b> <b>A</b> <b>G</b> <b>U</b> <b>G</b> <b>U</b> AACG                                  | nd   |     |
| R-08       | variant | U+4        | <b>G</b> CUGUGGGG <b>C</b> <b>A</b> <b>A</b> <b>G</b> <b>G</b> <b>U</b> <b>G</b> <b>A</b> <b>U</b> ACG                 | nd   |     |
| R-08       | variant | U+3        | <b>G</b> CUGUGGGG <b>C</b> <b>A</b> <b>A</b> <b>G</b> <b>G</b> <b>U</b> <b>G</b> <b>A</b> <b>A</b> <b>U</b> CG         | nd   |     |
| R-08       | variant | U+2        | <b>G</b> CUGUGGGG <b>C</b> <b>A</b> <b>A</b> <b>G</b> <b>G</b> <b>U</b> <b>G</b> <b>A</b> <b>A</b> <b>C</b> <b>U</b> G | nd   |     |
| R-25 +1 nt |         |            |                                                                                                                        |      |     |
| R-25       | variant | U+20/19    | <b>G</b> <b>U</b> U <b>G</b> U <b>U</b> CAUCU <b>U</b> UGG <b>U</b> U <b>U</b> GU                                      | nd   |     |
| R-25       | variant | C+19       | <b>G</b> <b>U</b> <b>C</b> <b>G</b> U <b>U</b> CAUCU <b>U</b> UGG <b>U</b> U <b>U</b> GU                               | nd   |     |
| R-25       | variant | U+18/17/16 | <b>G</b> U <b>G</b> <b>U</b> U <b>U</b> CAUCU <b>U</b> UGG <b>U</b> U <b>U</b> GU                                      | nd   |     |

|                                       |         |                 |                           |      |     |
|---------------------------------------|---------|-----------------|---------------------------|------|-----|
| R-25                                  | variant | C+17            | GUGUCUCAUCUUUGGUUUUGU     | nd   |     |
| R-25                                  | variant | C+16/15         | GUGUUCCAUCUUUGGUUUUGU     | nd   |     |
| R-25                                  | variant | U+15            | GUGUUCUAUCUUUGGUUUUGU     | nd   |     |
| R-25                                  | variant | U+14/13         | GUGUUCAUUCUUUGGUUUUGU     | nd   |     |
| R-25                                  | variant | C+13/12         | GUGUUCAUCUUUGGUUUUGU      | nd   |     |
| R-25                                  | variant | U+12/11/10/9    | GUGUUCAUCUUUGGUUUUGU      | nd   |     |
| R-25                                  | variant | C+11            | GUGUUCAUCUCUUGGUUUUGU     | nd   |     |
| R-25                                  | variant | C+10            | GUGUUCAUCUUCUGGUUUUGU     | nd   |     |
| R-25                                  | variant | C+9             | GUGUUCAUCUUUCGGUUUUUGU    | nd   |     |
| R-25                                  | variant | U+8             | GUGUUCAUCUUUGUGUUUUUGU    | nd   |     |
| R-25                                  | variant | U+7/6/5/4/3     | GUGUUCAUCUUUGGUUUUUUGU    | nd   |     |
| R-25                                  | variant | C+6             | GUGUUCAUCUUUGGUCUUUGU     | nd   |     |
| R-25                                  | variant | C+5             | GUGUUCAUCUUUGGUUCUUGU     | nd   |     |
| R-25                                  | variant | C+4             | GUGUUCAUCUUUGGUUUCUGU     | nd   |     |
| R-25                                  | variant | C+3             | GUGUUCAUCUUUGGUUUUCGU     | nd   |     |
| R-25                                  | variant | U+2/1           | GUGUUCAUCUUUGGUUUUGUU     | nd   |     |
| R-01 and R-30 +2 nt to +5 nt or -2 nt |         |                 |                           |      |     |
| R-01                                  | variant | +15+16          | GUGAACuuGUGGAUGAAGUUGG    | 1.7  | 0.1 |
| R-01                                  | variant | +12+13          | GUGAACGUGuuGAUGAAGUUGG    | 41.2 | 5.1 |
| R-30                                  | variant | +15+16          | GUAGAGuuCGGAGGCAGGAGGC    | 31.7 | 6.5 |
| R-30                                  | variant | +12+13          | GUAGAGCGGuuAGGCAGGAGGC    | 28.5 | 6.7 |
| R-01                                  | variant | -6-7            | GUGAACGUGGAUG--GUUGG      | nd   |     |
| R-01                                  | variant | -1-2            | GUGAACGUGGAUGAAGUU--      | nd   |     |
| R-30                                  | variant | -9-10           | GUAGAGCGGA--CAGGAGGC      | nd   |     |
| R-30                                  | variant | -7-8            | GUAGAGCGGAGG--GGAGGC      | nd   |     |
| R-01                                  | variant | +15+16+17       | GUGAACuuuGUGGAUGAAGUUGG   | nd   |     |
| R-01                                  | variant | +12+13+14       | GUGAACGUGuuuGAUGAAGUUGG   | 34.5 | 0.8 |
| R-30                                  | variant | +15+16+17       | GUAGAGuuuCGGAGGCAGGAGGC   | 5.6  | 1.2 |
| R-30                                  | variant | +12+13+14       | GUAGAGCGGuuuAGGCAGGAGGC   | 37.9 | 7.4 |
| R-01                                  | variant | +12+13+14+15    | GUGAACGUGuuuuGAUGAAGUUGG  | nd   |     |
| R-30                                  | variant | +15+16+17+18    | GUAGAGuuuuCGGAGGCAGGAGGC  | nd   |     |
| R-30                                  | variant | +12+13+14+15    | GUAGAGCGGuuuuAGGCAGGAGGC  | 8.9  | 2.4 |
| R-01                                  | variant | +12+13+14+15+16 | GUGAACGUGuuuuuGAUGAAGUUGG | nd   |     |

**Supplementary Table S3.** Sequences of primers used to amplify endogenous loci for testing the on-target activities of sgRNAs, and primers for qPCR. Target gene, sgRNAs using the primers, special PCR conditions are listed with each pair of primers. The primer sequences are listed in the lower portion of the table.

| Primers for target PCR |                                          |                     |                     |                       |
|------------------------|------------------------------------------|---------------------|---------------------|-----------------------|
| Gene                   | sgRNA                                    | Forward primer name | Reverse primer name | special PCR condition |
| HBB                    | R-01, R-03, R-04, R-05, R-06, R-07, R-08 | B-glo-Fwd           | B-glo-Rev           |                       |
| EGFP                   | R-19, R-20                               | T7                  | SSA-Cell-R4         | annealed at 50 °C     |
| CCR5                   | R-25, R-26, R-27, R-29, R-30             | CCR5_1_10_1_F       | CCR5_1_10_1_R       |                       |
| ERCC5                  | R-31, R-33, R-35, R-36, R-38, R-39, R-40 | ERCC5-F2            | ERCC5-R2            |                       |
| TARDBP                 | R-41, R-42, R-43, R-44                   | TAR-F               | TAR-R               |                       |
| HPRT1                  | R-52, R-53                               | HPRTe9-F            | HPRTe9-R            |                       |
| Primers for qPCR       |                                          |                     |                     |                       |
| Gene                   |                                          | Forward primer name | Reverse primer name |                       |
| sgRNA                  |                                          | CRI-qPCR-F          | CRI-qPCR-R          |                       |

| Primer name   | Primer sequence (5'to 3')           |
|---------------|-------------------------------------|
| B-glo-Fwd     | CCAACCTCCTAAGCCAGTGCCAGAAGAG        |
| B-glo-Rev     | AGTCAGTGCCTATCAGAAACCCAAGAG         |
| T7            | TAATACGACTCACTATAGGG                |
| SSA-Cell-R4   | TGCCGTCCTCGATGTTGTGGCG              |
| CCR5_1_10_1_F | GCACAGGGTGAACAAGATGG                |
| CCR5_1_10_1_R | ACCACCCCAAAGGTGACCGT                |
| ERCC5-F2      | TGAGGATGAAGAGAAAAATCCCGGAG          |
| ERCC5-R2      | ATCATTGTACCCATGATGAACTCTCATAAAAC    |
| TAR-F         | CAATAGCAATAGACAGTTAGAAAGAAGTGGAAG   |
| TAR-R         | GCTGCACCAGAATTAGAGCCACTATAAGAG      |
| HPRTe9-F      | CAATCCGCCCAAAGGGAAGTATAG            |
| HPRTe9-R      | TGCTTTGTTTTCAAAGATACACTCCCA         |
| CRI-qPCR-F    | GTTTTAGAGCTAGAAATAGCAAGTTAAAATAAGGC |
| CRI-qPCR-R    | AAAAGCACCGACTCGGTGCCAC              |



**Supplementary Table S4.** Human genomic loci tested for off-target activity using T7E1 assay. 18 off-target loci with insertions/DNA bulges and 62 off-target loci with deletions/sgRNA bulges are shown. For each site, mismatches (red letters), insertion (red “N” besides the “N” in the PAM sequence), and deletion (red “^”) are indicated below the genomic target sequence. The positions of insertion and deletion relative to the PAM are listed as a separate column. The table also includes plus / minus strand and chromosomal coordinates (hg 19) which can be used in the UCSC genome browser. The last two columns are the primers used to amplify the genomic loci.

**18 off-target sites with target-site insertions (DNA bulges)**

| Index      | Potential Off-target Sites                           | Inserted (DNA bulge) Position | Chromosomal Coordinates [start..end] (hg 19) | Strand | Primer                        | Primer Sequence              |
|------------|------------------------------------------------------|-------------------------------|----------------------------------------------|--------|-------------------------------|------------------------------|
| R-01 Off-1 | TTGTAA <b>A</b> ATGGATGAAGTGG <b>A</b> GG<br>G N G N | Ins 18                        | Chr2:186524309-186524332                     | +      | R1off-F1                      | TCAGTCTTTTACTCGGGGATACCAA    |
|            | R1off-R1                                             |                               |                                              |        | TTCATCTATCGTAACGCTTGGCAAT     |                              |
| R-01 Off-2 | CTGCAACGTGGATGAAGCTGG <b>A</b> GG<br>G N T N         | Ins 18                        | Chr21:16223748-16223771                      | -      | R1off-F2                      | GAACAGAATGATGAGGAAGGGAAGA    |
|            | R1off-R2                                             |                               |                                              |        | AACCTAGATGCCCATCAATAGTGGA     |                              |
| R-05 Off-1 | GCCTGCGCGTTTACTGCCCTGTGG<br>G N N                    | Ins 10, 11, or 12             | Chr1:162859322-162859345                     | +      | R5off-F1                      | TTGAGATGCCGTTGTTTCATGCCAA    |
|            | R5off-R1                                             |                               |                                              |        | ATTGCTCACACCACATCAGAAAGCC     |                              |
| R-07 Off-1 | AAGATGAACGTGGAGTGAAGTGGG<br>G G N N                  | Ins 7                         | Chr9:116503487-116503510                     | +      | R7off-F1                      | CCAGGCATCCTGCTGATCTTTTGT     |
|            | R7off-R2                                             |                               |                                              |        | TTAGGGGTAAAGGGCTTGCTGGTG      |                              |
| R-20 Off-1 | CGCC <b>A</b> AGATGGGCAGCCACCCCGG<br>GA G N N        | Ins 7                         | Chr20:21687581-21687604                      | +      | R20off-F1                     | GACGGCGTCTGTGACAAGTACAATG    |
|            | R20off-R1                                            |                               |                                              |        | GAGGTCTCTTACAAAAGGCCAGGA      |                              |
| R-20 Off-2 | ATCCAGGATGGGCACCACCCCGG<br>GA N N                    | Ins 3                         | Chr16:57067704-57067727                      | -      | R20off-F2                     | GGTACCTTGGAGGGATCTATTGCCT    |
|            | R20off-R2                                            |                               |                                              |        | CTGACACTTCTGCAGCCTTGGGTAG     |                              |
| R-25 Off-1 | ATGTTCTTCTTTGGCTTTTGTGG<br>G A N N                   | Ins 7                         | Chr10:59053283-59053306                      | -      | R25off-F1                     | TGACCAATGAGCAAAGAAATTATCCACA |
|            | R25off-R1                                            |                               |                                              |        | ACATCCCAAAGAATGAAGTTGGAGA     |                              |
| R-25 Off-2 | TATTT <b>C</b> ATCTTTGGTTTTAGTGGG<br>GTG N N         | Ins 3                         | Chr13:23183816-23183839                      | +      | R25off-F2                     | GCACACTAGTGGACTACTCAGGGTAT   |
|            | R25off-R2                                            |                               |                                              |        | ACAGGCATATCATATTGTATGTCAGAGTG |                              |
| R-25 Off-3 | AGTTCAACTTTGGTTTTGGTGGG<br>GT T N N                  | Ins 2 or 3                    | Chr15:37967958-37967981                      | -      | R25off-F3                     | AAGAAACAGGGATCCGTGCATAAAT    |
|            | R25off-R3                                            |                               |                                              |        | AATTTCTTTGTTGGAAAACCCTGGA     |                              |
| R-25 Off-4 | ATGTT <b>C</b> ATATTGGTTTTGTGTGG<br>G C NN           | Ins 1                         | Chr2:22543732-22543755                       | +      | R25off-F4                     | CATTGATTGTTTCATCCCGACAGTT    |
|            | R25off-R4                                            |                               |                                              |        | GGCTAAGGTGAAAAACAAAGCCAAT     |                              |
| R-26 Off-1 | TTTGCCCCCAGTGGGACATTGGG<br>GC G N N                  | Ins 3                         | Chr3:52496409-52496432                       | -      | R26off-F1                     | GCTACATCTGGTTCTGGTTGAGGC     |
|            | R26off-R1                                            |                               |                                              |        | TCCACCCTATCCAATGTCAGCAACA     |                              |
| R-30 Off-1 | GTGTGAGCGGAGGCAGGAGGC <b>A</b> GG<br>NA N            | Ins 19                        | Chr2:241904712-241904735                     | +      | R30off-F1                     | AGGAATGCTTTAGCGAGGAGGAAG     |
|            | R30off-R1                                            |                               |                                              |        | CTCTCCACTCCTCCTCTGGTTCTC      |                              |
| R-30 Off-2 | GTAGGAGAGGAGGCAGGAGGC <b>A</b> GG<br>N C N           | Ins 17 or 18                  | Chr19:35843790-35843813                      | +      | R30off-F2                     | TGATGCACTTGAGGACAGCTACTCT    |
|            | R30off-R2                                            |                               |                                              |        | TGTGCCTGGCTTCAAATATGTCTTA     |                              |
| R-30 Off-3 | CCAG <b>A</b> AGCGGAGGCAGGAGGC <b>T</b> GG<br>GT N N | Ins 16 or 17                  | Chr9:139753254-139753277                     | -      | R30off-F3                     | CCACTTGCCTTCTTTGAACTGG       |
|            | R30off-R3                                            |                               |                                              |        | AACACGATCTGATGGAGAAGGAAAG     |                              |
| R-30 Off-4 | GTAGAG <b>A</b> GGAGGCAGGAGGC <b>G</b> GG<br>C N N   | Ins 5, 6, or 7                | Chr7:66134975-66134998                       | -      | R30off-F4                     | CTCGGGAATGGCACCATCATCATC     |
|            | R30off-R4                                            |                               |                                              |        | CAGGTCATGGTGAACCTCAGAGCTA     |                              |

|            |                             |                |                         |   |           |                           |
|------------|-----------------------------|----------------|-------------------------|---|-----------|---------------------------|
| R-30 Off-5 | GTAGAGAGGAGGCAGGGAGGCCGGG   | Ins 5, 6, or 7 | Chr7:73404697-73404720  | - | R30off-F5 | TTCTGTAATTCTGAGGCCACGGAG  |
|            | <b>C</b> <b>N</b> <b>N</b>  |                |                         |   | R30off-R5 | TGATGAACCTCAGAGCCATTTGGGG |
| R-31 Off-1 | ACCAAGCACTTAAAGGAGTGCTGG    | Ins 2          | Chr9:86698731-86698754  | - | R31off-F1 | ACCTCCCACATGTACCTTGCTTTTT |
|            | <b>G</b> <b>N</b> <b>N</b>  |                |                         |   | R31off-R1 | GCCTTTCATGTCTGGAACATTTTTG |
| R-42 Off-1 | TCCAGCACTACAGAGCAGATTGG     | Ins 3          | Chr10:48593036-48593059 | - | R42off-F1 | CCAACCTCAAAGGACCTTGCTGTC  |
|            | <b>GG</b> <b>N</b> <b>N</b> |                |                         |   | R42off-R1 | TTCACTTTCAGAGAAGAGTCCTCC  |

### 62 off-target sites with target-site deletions (sgRNA bulges)

| Index      | Potential Off-target Sites                                                                                                                                                                                                                | Deleted (sgRNA bulge) Position | Chromosomal Coordinates [start..end] (hg 19) | Strand | Primer      | Primer Sequence              |
|------------|-------------------------------------------------------------------------------------------------------------------------------------------------------------------------------------------------------------------------------------------|--------------------------------|----------------------------------------------|--------|-------------|------------------------------|
| R-01 Del-1 | GGGAA^TTGGATGAAGTTGGGGG                                                                                                                                                                                                                   | Del 15                         | Chr7:85607600-85607621                       | +      | R1_del_1_F  | GAATGCAGTAAATTTAAAGCCCAAGG   |
|            | <b>T</b> <b>^G</b> <b>N</b>                                                                                                                                                                                                               |                                |                                              |        | R1_del_1_R  | CATCACAGAACACCAGAAAGACAGC    |
| R-01 Del-2 | CTGAA^GTGGATAAAGTTGGTGG                                                                                                                                                                                                                   | Del 15                         | Chr4:44622064-44622085                       | +      | R1_del_2_F  | GCAAATCTGGGTGGATGTACTGTTG    |
|            | <b>G</b> <b>^</b> <b>G</b> <b>N</b>                                                                                                                                                                                                       |                                |                                              |        | R1_del_2_R  | CCTGCACGATCTCACTATGTCTTGC    |
| R-01 Del-6 | GGGAACG^GGATGAAGGTGGTGG                                                                                                                                                                                                                   | Del 13                         | Chr8:37261849-37261870                       | -      | R1_del_6_F  | TTTACATGGTGGAGGACAGGACTTC    |
|            | <b>T</b> <b>^</b> <b>T</b> <b>N</b>                                                                                                                                                                                                       |                                |                                              |        | R1_del_6_R  | CCAATGATGATTATCTCCGTGACTG    |
| R-03 Del-1 | CACCTTACC^TGCCCCACACGG                                                                                                                                                                                                                    | Del 9 or 10                    | Chr7:134252717-134252738                     | -      | R5_del_1_F  | AATTCACTTTCCTTCTTTCTTTTG     |
|            | <b>G</b> <b>G</b> <b>^</b> <b>N</b>                                                                                                                                                                                                       |                                |                                              |        | R5_del_1_R  | CTCACACTCCCAGGTTCAAACAATC    |
| R-04 Del-1 | TCACCTTC^CCTTGCCCCACAGG                                                                                                                                                                                                                   | Del 12                         | Chr4:57092889-57092910                       | -      | R7_del_1_F  | GTTGAAATTTGATCCCCAGCATTG     |
|            | <b>G</b> <b>G</b> <b>^</b> <b>N</b>                                                                                                                                                                                                       |                                |                                              |        | R7_del_1_R  | AGAGAGGTGTGAAGGAGAGGGAAAG    |
| R-06 Del-1 | GGCTACTGCCCTG^GGGGCAGGG                                                                                                                                                                                                                   | Del 7                          | Chr14:100616656-100616677                    | -      | R11_del_1_F | TTGATGCCGTCTGTGTACTCAAGCA    |
|            | <b>G</b> <b>T</b> <b>^</b> <b>T</b> <b>A</b> <b>C</b> <b>T</b> <b>G</b> <b>C</b> <b>C</b> <b>T</b> <b>G</b> <b>^</b> <b>G</b> <b>G</b> <b>G</b> <b>C</b> <b>A</b> <b>N</b> <b>G</b>                                                       |                                |                                              |        | R11_del_1_R | GTTTGGTCTCTTTCCAAGGGGAAGC    |
| R-07 Del-1 | GCAGTG^ACGTGGATGAAGTTGG                                                                                                                                                                                                                   | Del 13 or 14                   | Chr3:161230477-161230498                     | -      | R13_del_1_F | GTTCCATTGTTGTTGGTTTTCTG      |
|            | <b>AG</b> <b>^</b> <b>N</b>                                                                                                                                                                                                               |                                |                                              |        | R13_del_1_R | TGCTACTATAAAGACGCATGCACAC    |
| R-07 Del-2 | GTGGGG^ACGTGGATGAAGTTGG                                                                                                                                                                                                                   | Del 13 or 14                   | Chr8:106659900-106659921                     | -      | R13_del_2_F | GTGAGTGAGAACATGTGGTGTTC      |
|            | <b>A</b> <b>T</b> <b>^</b> <b>N</b>                                                                                                                                                                                                       |                                |                                              |        | R13_del_2_R | TGGTGCTATTACAACAGCAAAGAG     |
| R-07 Del-3 | GAGG^GAACGTGGATGAAGCTGG                                                                                                                                                                                                                   | Del 16                         | Chr2:116826850-116826871                     | +      | R13_del_3_F | AGACGTGGAATCAACACAAATGCC     |
|            | <b>G</b> <b>A</b> <b>C</b> <b>^</b> <b>A</b> <b>A</b> <b>C</b> <b>G</b> <b>T</b> <b>G</b> <b>A</b> <b>T</b> <b>G</b> <b>A</b> <b>A</b> <b>G</b> <b>C</b> <b>T</b> <b>G</b> <b>A</b> <b>A</b> <b>G</b> <b>C</b> <b>T</b> <b>G</b> <b>G</b> |                                |                                              |        | R13_del_3_R | ACAGATGTGCGATGTCAAGATCACC    |
| R-08 Del-1 | GATGAGGGG^AAGGTGAACGTGG                                                                                                                                                                                                                   | Del 11                         | Chr23:6739538-6739559                        | -      | R15_del_1_F | ATAGAGACTGCTTGAAAGCGTGTG     |
|            | <b>C</b> <b>T</b> <b>^</b> <b>N</b>                                                                                                                                                                                                       |                                |                                              |        | R15_del_1_R | AGCCTTACCGAGGACTCCTTTTACC    |
| R-08 Del-2 | GCTG^GGGGCAACGTGAACGTGG                                                                                                                                                                                                                   | Del 16                         | Chr17:38953488-38953509                      | -      | R15_del_2_F | CTGAGTCGTGGGAGATCTGTTGCTG    |
|            | <b>G</b> <b>C</b> <b>T</b> <b>^</b> <b>G</b> <b>G</b> <b>G</b> <b>C</b> <b>A</b> <b>A</b> <b>C</b> <b>G</b> <b>T</b> <b>G</b> <b>A</b> <b>A</b> <b>C</b> <b>T</b> <b>G</b> <b>G</b>                                                       |                                |                                              |        | R15_del_2_R | ATACACCTGACCGCAAACCTTTGAGAC  |
| R-19 Del-1 | GGTGGT^CAGATCAACTTCAGGG                                                                                                                                                                                                                   | Del 14                         | Chr10:79211096-79211117                      | -      | R19_del_1_F | CCCTGAGATACAAGAGGAGCCTGAC    |
|            | <b>G</b> <b>T</b> <b>G</b> <b>T</b> <b>^</b> <b>C</b> <b>A</b> <b>G</b> <b>A</b> <b>T</b> <b>C</b> <b>A</b> <b>A</b> <b>C</b> <b>T</b> <b>T</b> <b>C</b> <b>A</b> <b>G</b> <b>G</b>                                                       |                                |                                              |        | R19_del_1_R | CGTCCTCTGAACTTCAATTGCCCTG    |
| R-20 Del-1 | GACCAGGA^GGGCAGCAACCAGG                                                                                                                                                                                                                   | Del 12                         | Chr14:24535619-24535640                      | +      | R20_del_1_F | GAATGACATGGAGATGCTAGAGCAGA   |
|            | <b>G</b> <b>A</b> <b>C</b> <b>C</b> <b>A</b> <b>G</b> <b>G</b> <b>A</b> <b>^</b> <b>G</b> <b>G</b> <b>C</b> <b>A</b> <b>G</b> <b>C</b> <b>A</b> <b>A</b> <b>C</b> <b>C</b> <b>A</b> <b>G</b> <b>G</b>                                     |                                |                                              |        | R20_del_1_R | AGAGGCTTTCCATACCTATGTGCCA    |
| R-25 Del-1 | GTCTTC^TCTTTGGTTTTGTAGG                                                                                                                                                                                                                   | Del 14                         | Chr7:121693943-121693964                     | +      | R25_del_1_F | TGCCCAGTAAGCATTGGCTATAATAATC |
|            | <b>G</b> <b>^</b> <b>N</b>                                                                                                                                                                                                                |                                |                                              |        | R25_del_1_R | GTCCCATATCATCCTCCAGAAATCC    |

|             |                                          |                  |                          |   |              |                               |
|-------------|------------------------------------------|------------------|--------------------------|---|--------------|-------------------------------|
| R-25 Del-10 | GTGTTTCATCTT^GGTTTTGTACG                 | Del 9, 10, or 11 | Chr4:70483200-70483221   | - | R25_del_10_F | GCTTTAGGATCTGCTGCCCTCCTAT     |
|             | GTGTTTCATCTT^GGTTTTGT <b>NG</b>          |                  |                          |   | R25_del_10_R | CGTCTTAATGGACCCTGTATGTTGCT    |
| R-25 Del-2  | ATGCTC^TCTTTGGTTTTGTGG                   | Del 14           | Chr2:230663047-230663068 | - | R25_del_2_F  | GACCCGGCTGCTTAAATTACAAATG     |
|             | <b>G T ^ N</b>                           |                  |                          |   | R25_del_2_R  | TTGTTCCAGACAAGGAAAAGCTGAC     |
| R-25 Del-3  | ATGGTC^TCTTTGGTTTTGTAGG                  | Del 14           | Chr17:59233856-59233877  | + | R25_del_3_F  | TGTTTCTTTGGGGGAACTTAGAG       |
|             | <b>G T ^ N</b>                           |                  |                          |   | R25_del_3_R  | TTTCTTACCAAATGATGAACTCGAC     |
| R-25 Del-4  | ATGTTTCAT^TTTGGTTTTGTGG                  | Del 12           | Chr21:27369860-27369881  | - | R25_del_4_F  | GAGAACATAACTAAAAACAAAAGAGAAAC |
|             | <b>G ^ N</b>                             |                  |                          |   | R25_del_4_R  | GCAAGAAATCCTCTTCTGTAAAGAAACC  |
| R-25 Del-5  | TTATTCAT^TTTGGTTTTGTGGG                  | Del 12           | Chr6:131504701-131504722 | - | R25_del_5_F  | ACAAAAAGGGGATTTTGGAGGTAGG     |
|             | <b>G G ^ N</b>                           |                  |                          |   | R25_del_5_R  | CAGTGCTCTCCAGGCTCACTCTC       |
| R-25 Del-6  | GGTTTCAT^TTTGGTTTTGTGG                   | Del 12           | Chr18:8673547-8673568    | - | R25_del_6_F  | CAGAAGATGTTTCAGAAACAAGCAAGG   |
|             | <b>TG ^ N</b>                            |                  |                          |   | R25_del_6_R  | ATTCTGTCTGTGAGGCGTGTCTTTC     |
| R-25 Del-8  | GTGTTCAC^CTTTGGTTGTGTAGG                 | Del 13           | Chr5:74921783-74921804   | + | R25_del_8_F  | CTCACCATTGCAGGAGAGAGGAAGT     |
|             | GTGTTCAC^CTTTGGTT <b>T</b> GT <b>NGG</b> |                  |                          |   | R25_del_8_R  | GAATGGGAAGAAGGAATCTGGCTGC     |
| R-25 Del-9  | GTGTCTTCTT^GGTTTTGTGG                    | Del 9, 10, or 11 | Chr8:114654423-114654444 | - | R25_del_9_F  | AAGTTACTCACCTGTCCCCTAGAGTG    |
|             | GTGTCT <b>A</b> CTT^GGTTTTGT <b>NGG</b>  |                  |                          |   | R25_del_9_R  | ATTTTGCCTGAGGCTGGCCTTCATA     |
| R-27 Del-1  | GGAAGCA^AGTGAGCCAGAAGG                   | Del 13           | Chr13:95847651-95847672  | + | R27_del_1_F  | GAACACGGGAGTTGGTTGGAAT        |
|             | <b>C ^ N</b>                             |                  |                          |   | R27_del_1_R  | ATAGGTGATTGTGAAAAGAAGC        |
| R-27 Del-3  | GAAAGCATAGTGA^CCCAGAGGG                  | Del 7            | Chr7:51205518-51205539   | - | R27_del_3_F  | AATTATCACTGATTTTTACTGAGAACTG  |
|             | <b>GC ^ N</b>                            |                  |                          |   | R27_del_3_R  | ACTGGGCTATTGTTAATATGATGG      |
| R-27 Del-4  | GGCA^CATAGTGAGCCAAGATGG                  | Del 16           | Chr5:99191677-99191698   | + | R27_del_4_F  | GACCCAGCCATCCCATTACTTGGTA     |
|             | GGCA^CATAGTGAGCC <b>C</b> AG <b>NGG</b>  |                  |                          |   | R27_del_4_R  | TCTGAAAAGCGCAATATTCCGGGTGG    |
| R-27 Del-5  | GGCAGC^TAGTGAGCCAGAGGA                   | Del 14           | Chr1:164837564-164837585 | + | R27_del_5_F  | CATCCGTGCACAATACCAGGCTAAG     |
|             | GGCAGC^TAGTGAGCC <b>C</b> AG <b>NG</b>   |                  |                          |   | R27_del_5_R  | GCTGCTTGCAAATCAACCAGGTTTC     |
| R-27 Del-6  | GGCAGCA^AGTGAGGCCAGAAGG                  | Del 13           | Chr13:19571247-19571268  | + | R27_del_6_F  | AGTCCAAGTCAGATGGTCAGAAAGCA    |
|             | GGCAGCA^AGTGAG <b>C</b> CAG <b>NGG</b>   |                  |                          |   | R27_del_6_R  | TCCTTGCAATGCCAAGAGCAGAGATT    |
| R-29 Del-1  | GAGTGT^GAGCGGAGGCAGGAGG                  | Del 14           | Chr2:238918342-238918363 | - | R29_del_1_F  | CAATAGCTGTCTATTGTGCCTTTGTC    |
|             | <b>T A ^ N</b>                           |                  |                          |   | R29_del_1_R  | CCTGGAAGTGACATCCTATGCAAAC     |
| R-29 Del-2  | CTGAGGAG^GCGGAGGCAGGAGG                  | Del 12           | Chr7:8334655-8334676     | - | R29_del_2_F  | CGAGCCAGAAGTATATTCTACGTG      |
|             | <b>G T ^ N</b>                           |                  |                          |   | R29_del_2_R  | CCTGGGCAACAAAGTGAGACC         |
| R-29 Del-5  | GTGAGTAGAG^GGAGGGAGGAGG                  | Del 10           | Chr8:83327062-83327083   | - | R29_del_5_F  | ATATACCAGCCAACCTGGGATGCCT     |
|             | GTGAGTAGAG^GGAG <b>C</b> AG <b>NGG</b>   |                  |                          |   | R29_del_5_R  | ACAAGTTTTCAGTGAGGGGAGGGAA     |
| R-30 Del-11 | GAAGGGCGGAGG^AGGAGGCAGG                  | Del 8            | Chr16:30382121-30382142  | + | R30_del_11_F | AGGGCTGTAAGACCAATCAGAGGAC     |
|             | <b>T A ^ N</b>                           |                  |                          |   | R30_del_11_R | ACCTGCTCCCCTTTTCATTGG         |
| R-30 Del-12 | GGAGAGAGGAGG^AGGAGGCTGG                  | Del 8            | Chr3:194821292-194821313 | - | R30_del_12_F | CAGAGTCTTCTGCCCTGGCATC        |
|             | <b>T C ^ N</b>                           |                  |                          |   | R30_del_12_R | AGAAGGGCACCACAGCCTCAG         |
| R-30 Del-14 | GCAAAGCGGAGGC^GGAGGCAGG                  | Del 7            | Chr6:105436556-105436577 | - | R30_del_14_F | AGCCACTTGGCCTGTAGTTTTTCTT     |
|             | <b>T G ^ N</b>                           |                  |                          |   | R30_del_14_R | GAGGTCAGGAGTTTGAACAGCCT       |
| R-30 Del-15 | GCAGCGCGGAGGC^GGAGGCGGG                  | Del 7            | Chr9:132372864-132372885 | + | R30_del_15_F | CCTAGCAATTTTGGGCTGAACAAC      |
|             | <b>T A ^ N</b>                           |                  |                          |   | R30_del_15_R | AAACTTCTCAGCCTCTCGCTCCAG      |

|             |                                              |        |                          |   |              |                               |
|-------------|----------------------------------------------|--------|--------------------------|---|--------------|-------------------------------|
| R-30 Del-16 | CTAGGGCGGAGGC^GGAGGCGGG                      | Del 7  | Chr9:96108620-96108641   | - | R30_del_16_F | GCTGGGCTGGAGAGAAGGTG          |
|             | G A ^ N                                      |        |                          |   | R30_del_16_R | GTCCTTGCAAACCTCCCGTTCC        |
| R-30 Del-17 | GTGGAG^GGAGGCAGGAGGCAGG                      | Del 14 | Chr3:128063055-128063076 | - | R30_del_17_F | TGTGTGCAGAGGTGAGATCCTATGAG    |
|             | GT A G A C ^ G G A G G C A G G A G G C N G G |        |                          |   | R30_del_17_R | GGACCTGGGTTCTGTAGGAAGAAAAC    |
| R-30 Del-2  | GAAG^GAGGAGGCAGGAGGCTGG                      | Del 16 | Chr8:74322905-74322926   | + | R30_del_2_F  | AGGCTGCTGACCACAGTGCCTAC       |
|             | T ^ C ^ N                                    |        |                          |   | R30_del_2_R  | GGAGTTTATTTCCCTCCTCTTGAAGC    |
| R-30 Del-4  | GGAG^GTGGAGGCAGGAGGCTGG                      | Del 16 | Chr20:55620115-55620136  | - | R30_del_4_F  | AACTGTGAGTGCGGTGACTCTGAAG     |
|             | T ^ C ^ N                                    |        |                          |   | R30_del_4_R  | AGCACACCTCTGCTCTCATGGAC       |
| R-30 Del-6  | GGTGA^GGAGGCAGGAGGCAGG                       | Del 14 | Chr7:132937943-132937964 | + | R30_del_6_F  | TTGGCTTCCTTGGAGCCTAGC         |
|             | TA ^ N                                       |        |                          |   | R30_del_6_R  | CAAGGAGGAAAGGGGAGAGCAG        |
| R-30 Del-9  | GCAGGGCGG^GGCAGGAGGCTGG                      | Del 11 | Chr10:70883851-70883872  | + | R30_del_9_F  | GTAATTTGCCCGCCCCTCTC          |
|             | T A ^ N                                      |        |                          |   | R30_del_9_R  | CCCTACTCCACTCCTCTTCCCTCAG     |
| R-31 Del-1  | GGCTAGCA^TTAAAGGAGTCAGG                      | Del 12 | Chr23:8280850-8280871    | + | R31_del_1_F  | TGTGTAACAAATTGCCACAAATTTAGC   |
|             | C A ^ N                                      |        |                          |   | R31_del_1_R  | GATGTTGATAGCTGCAAGAAACTGG     |
| R-33 Del-1  | GCAAG^ACTTAAAGCAGTCCGGG                      | Del 15 | Chr15:70302028-70302049  | - | R33_del_1_F  | CTCATGGGGCAAATGGTCTTCAACC     |
|             | GCAAG ^ ACTTAAAG G A G T C C N G G           |        |                          |   | R33_del_1_R  | CCCCATCACATGAGAGAATGTGGGT     |
| R-35 Del-1  | GTGAGGTCCCA^GGCGATCCTGG                      | Del 9  | Chr1:47674820-47674841   | + | R35_del_1_F  | GACGCTGGAGACACATAGAATCCCT     |
|             | GTGA G T C C C A ^ G G C G A T C C N G G     |        |                          |   | R35_del_1_R  | GTGTTCAATGGGCTATCAGGCTTCC     |
| R-36 Del-2  | GCTAGT^AAGAAACAGACTTAGG                      | Del 14 | Chr2:34787318-34787339   | + | R36_del_2_F  | TCTCATTGATCCTCATTGCACTCTG     |
|             | T ^ N                                        |        |                          |   | R36_del_2_R  | AAAGCAAATGTCTTTGGCCACATTG     |
| R-38 Del-5  | GATTTTCT^TTGAGGTCCAAGG                       | Del 12 | Chr15:57922643-57922664  | + | R38_del_5_F  | GGCTTCTCCATAAATGCCCCCATTTG    |
|             | GATTTTCT ^ TTGAG T C C C A N G G             |        |                          |   | R38_del_5_R  | CACCGGGTAGGAAGTCTATCCACAG     |
| R-39 Del-2  | GGAATCAAA^TGAGAAGATGTGG                      | Del 11 | Chr5:171805659-171805680 | - | R39_del_2_F  | AATGCACACCAATGCCAATACTACC     |
|             | A ^ N                                        |        |                          |   | R39_del_2_R  | GGCCTATAGGAGCCACTTTCAAGC      |
| R-39 Del-3  | GAAGACAAAG^GAGAAGATGAGG                      | Del 10 | Chr19:8322816-8322837    | - | R39_del_3_F  | TGGTCCCATCCTATAGCACCTTCTC     |
|             | G A ^ N                                      |        |                          |   | R39_del_3_R  | AGGCAGTCCTGGAATCTCAGACAC      |
| R-39 Del-4  | AGAATCAAAAG^GAGAAGATGAGG                     | Del 10 | Chr20:17602724-17602745  | + | R39_del_4_F  | GAAGGTGTTGAGCTGTGGAGGTG       |
|             | G A ^ N                                      |        |                          |   | R39_del_4_R  | TGACCCAGTATGCTCCTTTTCATCAG    |
| R-39 Del-5  | GGAAA^AAAGTGAGAACATGTGG                      | Del 15 | ChrX:71641287-71641308   | + | R39_del_5_F  | GTAACGTCTGCCATGCTGGTCTG       |
|             | GGAAA ^ AAAGTGAGA G A T C N G G              |        |                          |   | R39_del_5_R  | AGCAGTGGAAGTGAATAATAGCAGAGT   |
| R-39 Del-6  | GGAAACAAAG^GAGAAGATGTGC                      | Del 10 | Chr2:96791029-96791050   | - | R39_del_6_F  | CCCACTTCCAGTCACTCCCACCTAC     |
|             | GGAAACAAAG ^ GAGAAGAT N G                    |        |                          |   | R39_del_6_R  | TATCAAGATGGTGAGCATGGGAGCA     |
| R-39 Del-7  | GGAAACAAAGT^AGAAGAAGAGG                      | Del 9  | Chr20:16523350-16523371  | + | R39_del_7_F  | ATATGAACAAACACCTGAACGGGGC     |
|             | GGAAACAAAGT ^ AGAAGA T N G G                 |        |                          |   | R39_del_7_R  | GGATGCATCTCCATTCTGTACCCT      |
| R-39 Del-8  | GGAAACAAAATGA^AAGATGAGG                      | Del 7  | Chr10:21061648-21061669  | + | R39_del_8_F  | AACGCACAGCAATTGTATATGGAGA     |
|             | GGAAACAAA G TGA ^ AAGAT N G G                |        |                          |   | R39_del_8_R  | TGGCAAGATTAACCAATTTAGCTACCCAC |
| R-40 Del-1  | GCCTGTTTTT^TGTTTATGATGG                      | Del 10 | Chr8:32701225-32701246   | + | R40_del_1_F  | TAGTCACTGTTGGTAAGCACATTTCT    |
|             | GCCT A TTTT ^ TGTTTATGAT N G G               |        |                          |   | R40_del_1_R  | AGCCCAAACCTCAATGGTAAAGCA      |
| R-40 Del-2  | GCCTATTTTTG^GTTTGAAGGGG                      | Del 9  | Chr3:104520703-104520724 | + | R40_del_2_F  | AACACGTCTAGGGTCATACCATGTCA    |
|             | GCCTATTTTTG ^ GTTTGA T N G G                 |        |                          |   | R40_del_2_R  | TCGTTGGTTGAACATCTTTCTCAGTCT   |

|            |                            |              |                         |   |             |                               |
|------------|----------------------------|--------------|-------------------------|---|-------------|-------------------------------|
| R-41 Del-1 | GCAGA^CAGTTGGGGTGTGATGG    | Del 15       | Chr11:11580913-11580934 | - | R41_del_1_F | AATAACAGCACCTCCTTCACAGGCT     |
|            | GCAGF^CAGTTGGGGT^A^GANGG   |              |                         |   | R41_del_1_R | CATGAGATTGTAGATGGTGCAGGTCC    |
| R-42 Del-1 | TCCAGC^CTACAGAGCAGTTTGG    | Del 14       | Chr9:31067668-31067689  | - | R42_del_1_F | ATGAGACCACTCCCAAACGAATTG      |
|            | GG ^ N                     |              |                         |   | R42_del_1_R | TGACCAAATTCTATCAGGTTTATACCAC  |
| R-42 Del-2 | GGCAGCAC^ACAGAGCAGATTGG    | Del 12       | Chr4:69223620-69223641  | - | R42_del_2_F | TACCACAGAATGCAGCCTTGAATCC     |
|            | GGCAGCAC^ACAGAGCAG^T^N^GG  |              |                         |   | R42_del_2_R | ACAAAAATTAGCCAGGCATGGTGGT     |
| R-42 Del-3 | GGCAGCACTA^AGAGCAGTCGGG    | Del 10       | Chr20:17812309-17812330 | - | R42_del_3_F | GGTCTCGGGAAAGGAGCATTITGAC     |
|            | GGCAGCACTA^AGAGCAGT^TN^GG  |              |                         |   | R42_del_3_R | AAGTCCCAGTCTGCAGGTAACAAGT     |
| R-43 Del-1 | CCAGAA^TACAGAGCAGTTGGGG    | Del 14       | Chr22:37278975-37278996 | + | R43_del_1_F | CAGCTAGGACACAGGCTTTGAGG       |
|            | G C ^ N                    |              |                         |   | R43_del_1_R | ATCACCTCAGCTCTCACATCTAGGG     |
| R-44 Del-1 | GCCTG^CTGGTGCTGCTGGCAGG    | Del 15       | Chr17:72942981-72943002 | + | R44_del_1_F | ACTGAGTACTGCCTCATCTGCTGTG     |
|            | GCCTG^CTGGT^T^TGCTGGC^N^GG |              |                         |   | R44_del_1_R | CAATGGCCACGATGGAGAAATAGGC     |
| R-52 Del-1 | GTTT^TGTCATTAGTGAATGGG     | Del 16       | Chr13:31515245-31515266 | + | R52_del_1_F | ATTGAAAAGTGGAGTATTGGTAAGACCAT |
|            | GTTT^TGTCATTAGTGAAT^CN^GG  |              |                         |   | R52_del_1_R | CCCAGTTACGGACTCACTGGGATAG     |
| R-53 Del-2 | ACAAGTTG^ACTCTCATCTTGGG    | Del 11 or 12 | Chr14:78919187-78919208 | - | R53_del_2_F | TGGGCTTATTAATCAATGGCATCAG     |
|            | G C ^ N                    |              |                         |   | R53_del_2_R | ACACATGAGGCATTATTGGACTTGG     |

**Supplementary Table S5.** Primers used in PCRs for deep sequencing by an Illumina Miseq 2X250 paired-end read. Primers for reaction 1 contains adapter sequences shown (same adapter sequences also present in reaction-2 primers), in addition to gene-specific sequences. Full sequences for primers in reaction 1 can be found in **Supplementary Table S6**. Primers for reaction 2 contain barcodes in the reverse primers, as indicated in red. In the final pooled sample containing all the amplicons, each barcode has similar occurrence to insure diversity required by Illumina sequencing. Custom sequencing primers for read 1 (forward), read 2 (reverse), and index read (read barcodes) are used in place of standard Illumina sequencing primers.

#### Primers for Illumina reaction 1

Forward TCTACAGTCCGACGATCA-gene specific sequence  
 Reverse GACGTGTGCTCTTCCGATC-gene specific sequence

#### Primers for Illumina reaction 2

Forward primer

Rxn2For AATGATACGGCGACCACCGAGATCTACACGTTTCAGAGTTCTACAGTCCGACGATCA

Reverse primers with 12 different barcodes

|               |                           |          |                                     |
|---------------|---------------------------|----------|-------------------------------------|
| Kozich_bar_1  | CAAGCAGAAGACGGCATAACGAGat | AAGTCGAG | ATGTGACTGGAGTTCAGACGTGTGCTCTTCCGATC |
| Kozich_bar_2  | CAAGCAGAAGACGGCATAACGAGat | ATACTTCG | ATGTGACTGGAGTTCAGACGTGTGCTCTTCCGATC |
| Kozich_bar_3  | CAAGCAGAAGACGGCATAACGAGat | AGCTGCTA | ATGTGACTGGAGTTCAGACGTGTGCTCTTCCGATC |
| Kozich_bar_4  | CAAGCAGAAGACGGCATAACGAGat | CATAGAGA | ATGTGACTGGAGTTCAGACGTGTGCTCTTCCGATC |
| Kozich_bar_5  | CAAGCAGAAGACGGCATAACGAGat | CGTAGATC | ATGTGACTGGAGTTCAGACGTGTGCTCTTCCGATC |
| Kozich_bar_6  | CAAGCAGAAGACGGCATAACGAGat | CTCGTTAC | ATGTGACTGGAGTTCAGACGTGTGCTCTTCCGATC |
| Kozich_bar_7  | CAAGCAGAAGACGGCATAACGAGat | GCGCACGT | ATGTGACTGGAGTTCAGACGTGTGCTCTTCCGATC |
| Kozich_bar_8  | CAAGCAGAAGACGGCATAACGAGat | GGTACTAT | ATGTGACTGGAGTTCAGACGTGTGCTCTTCCGATC |
| Kozich_bar_9  | CAAGCAGAAGACGGCATAACGAGat | GTATACGC | ATGTGACTGGAGTTCAGACGTGTGCTCTTCCGATC |
| Kozich_bar_10 | CAAGCAGAAGACGGCATAACGAGat | TACGAGCA | ATGTGACTGGAGTTCAGACGTGTGCTCTTCCGATC |
| Kozich_bar_11 | CAAGCAGAAGACGGCATAACGAGat | TCAGCGTT | ATGTGACTGGAGTTCAGACGTGTGCTCTTCCGATC |
| Kozich_bar_12 | CAAGCAGAAGACGGCATAACGAGat | TCGCTACG | ATGTGACTGGAGTTCAGACGTGTGCTCTTCCGATC |

#### Custom sequencing primer

NewIndex\_Read GATCGGAAGAGCACACGTCTGAACTCCAGTCACAT  
 NewRead\_1 TCTACACGTTTCAGAGTTCTACAGTCCGACGATCA  
 NewRead\_2 TGTGACTGGAGTTCAGACGTGTGCTCTTCCGATC

**Supplementary Table S6** (see the attached excel files).

Human genomic loci tested for off-target activity using deep sequencing (Illumina Miseq 2X250 paired-end). On-target loci (\_tar), Off-target loci with insertions/DNA bulges (\_ins), and deletions/sgRNA bulges (\_del), are shown. Also shown are amplicon sequence, primers used for locus-specific PCR, expected sizes of left and right cleavage products (left\_prod\_len and right\_prod\_len), mock indel percentages, treated sample indel percentages, fold change of treated to mock %indel, and 2-sided P-values determined by Fisher's exact test comparing treated and mock.
